# Supplementary material for: CCNE1 and PLK1 Mediate Resistance to Palbociclib in HR+/HER2− Metastatic Breast Cancer
Source: Oxford University Press journal article supplement (doi:10.1158/1078-0432.ccr-22-2206), 2023-02-07
Supplement: ccr-22-2206_supplementary_figure_s6_suppfs6.docx [file ccr-22-2206_supplementary_figure_s6_suppfs6.docx]

**Supplementary Figure 6. PALOMA-3 study as validation dataset.**


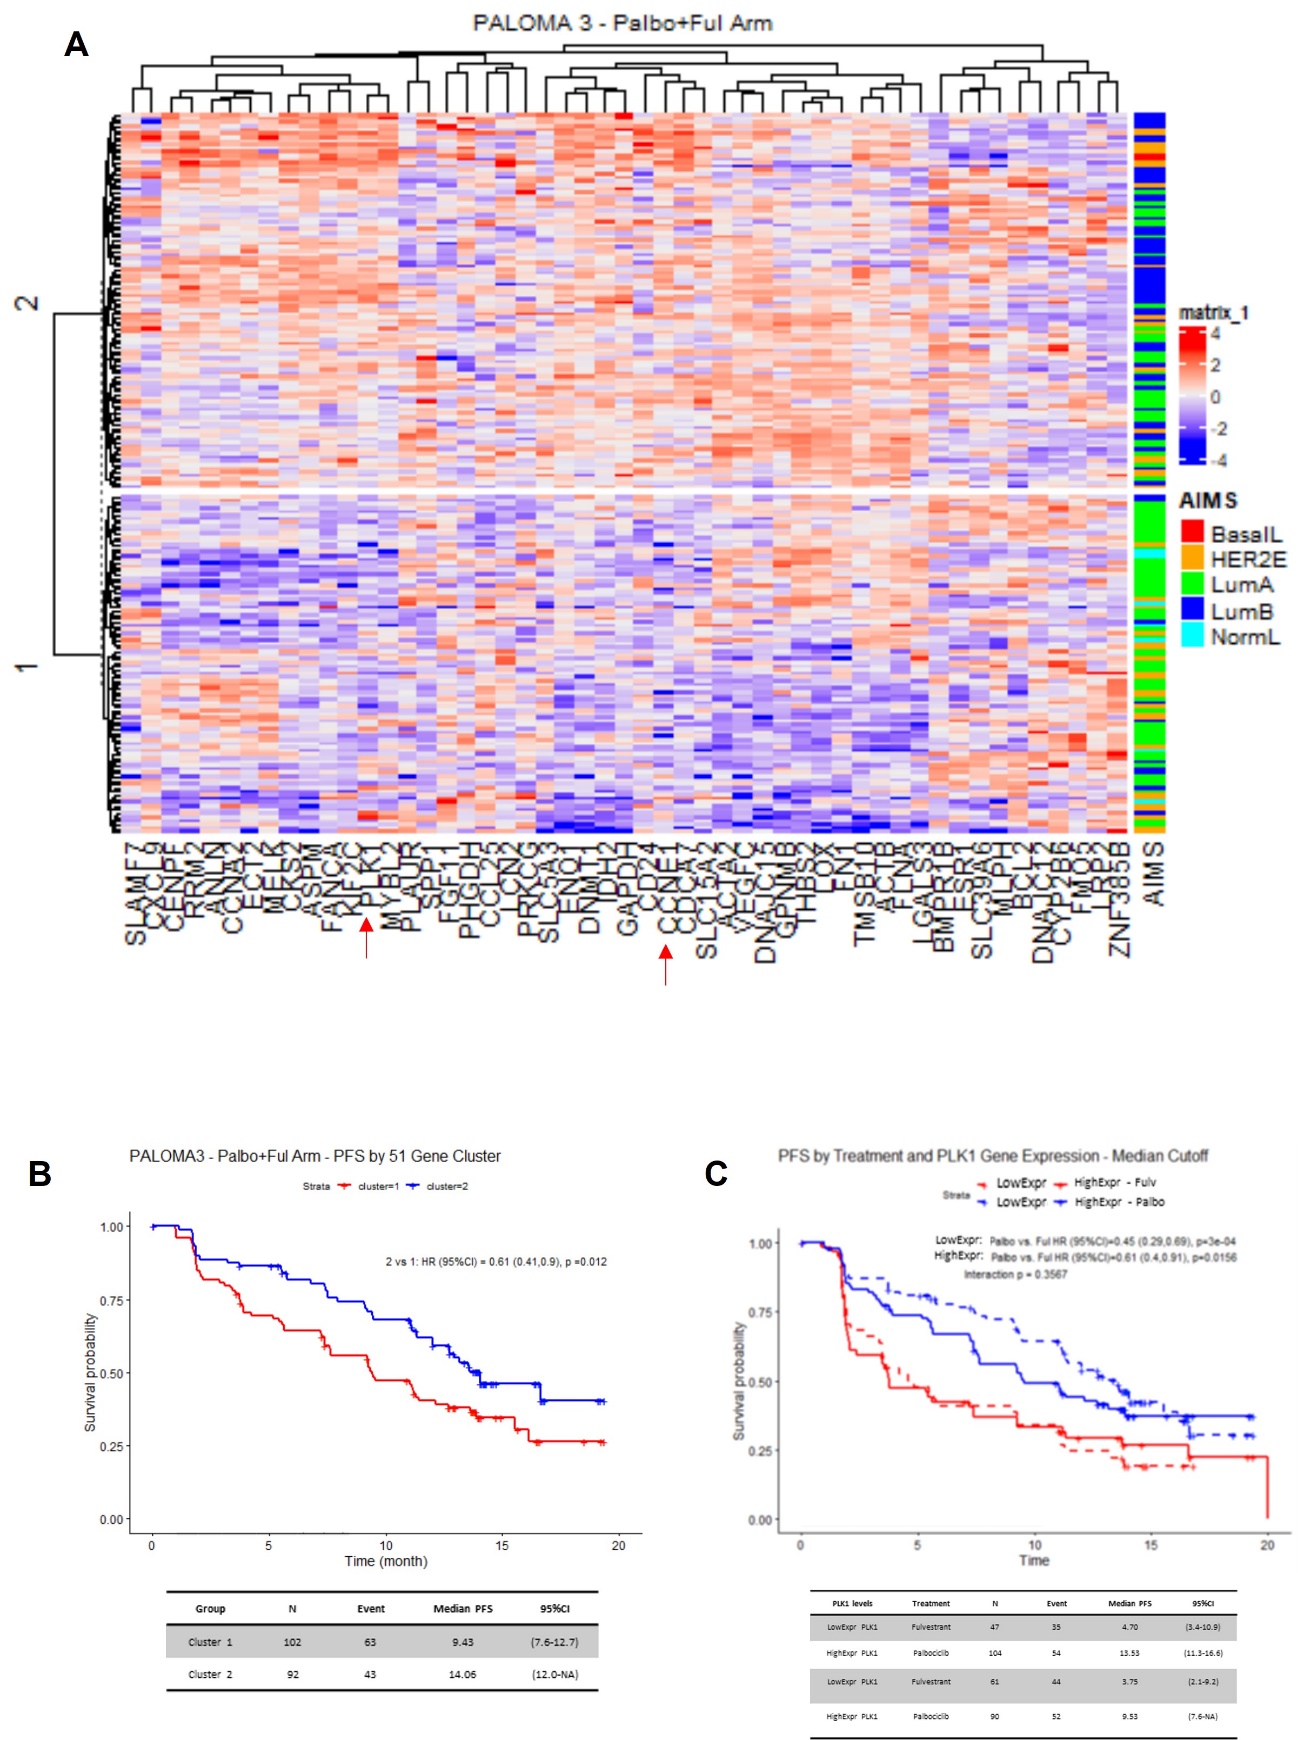


A) Unsupervised hierarchical clustering complete linkage and euclidean distance of n=194 patients, treated with palbociclib plus ET according to 51 differentially expressed significant genes by SAM analysis (FDR<0.05), in refractory vs sensitive tumors (each row represents a patient, and each column a gene). It includes the clinical subtype classification of patients in Luminal A, Luminal B, Basal, HER2 enriched and Normal. B) Progression Free Survival analysis (PFS) analysis on cluster 1 and 2. C) PFS on PLK1 expression levels.

In PFS curves, Kaplan-Meier plots are used to represent the survival curves, while Cox models, adjusted by prognosis variables, are used to represent the values.

LowExpr PLK1 (below median value); HighExpr PLK1 (above median value).
