# Supplementary material for: CCNE1 and PLK1 Mediate Resistance to Palbociclib in HR+/HER2− Metastatic Breast Cancer
Source: Oxford University Press journal article supplement (doi:10.1158/1078-0432.ccr-22-2206), 2023-02-07
Supplement: ccr-22-2206_supplementary_table_s1_suppts1.docx [file ccr-22-2206_supplementary_table_s1_suppts1.docx]

**Supplementary Table 1. List of 51 genes differentially expressed in tumors, grouped by sensitive or refractory to palbociclib plus ET. Controlling the FDR at 5% with the q-value method (SAM).**

| **Gene** | **Score** | **Fold chane** | **q-value** |
| --- | --- | --- | --- |
| BCL2 | -3.321 | 0.917 | 0.0051 |
| SLC39A6 | -2.997 | 0.914 | 0.0051 |
| FMO5 | -2.932 | 0.894 | 0.0051 |
| ESR1 | -2.924 | 0.912 | 0.0051 |
| BMPR1B | -2.685 | 0.857 | 0.0051 |
| MLPH | -2.66 | 0.939 | 0.0051 |
| DNAJC12 | -2.645 | 0.909 | 0.0051 |
| ZNF385B | -2.569 | 0.892 | 0.04231 |
| LRP2 | -2.54 | 0.894 | 0.04231 |
| CYP2B6 | -2.416 | 0.894 | 0.06139 |
| IDH2 | 3.141 | 1.071 | 0.0374 |
| ENO1 | 2.731 | 1.05 | 0.0373 |
| CD24 | 2.701 | 1.093 | 0.0374 |
| SLC15A2 | 2.632 | 1.185 | 0.03914 |
| CCL25 | 2.479 | 1.468 | 0.03914 |
| VEGFC | 2.459 | 1.065 | 0.03914 |
| KIF2C | 2.455 | 1.112 | 0.03914 |
| **CCNE1** | 2.453 | 1.116 | 0.03914 |
| FANCA | 2.431 | 1.085 | 0.03914 |
| TMSB10 | 2.42 | 1.037 | 0.03914 |
| DNMT1 | 2.419 | 1.045 | 0.03914 |
| LGALS3 | 2.411 | 1.056 | 0.03914 |
| ANLN | 2.403 | 1.072 | 0.03914 |
| MELK | 2.387 | 1.065 | 0.03914 |
| LCN2 | 2.367 | 1.348 | 0.03914 |
| CDCA7 | 2.361 | 1.176 | 0.03914 |
| FGF11 | 2.357 | 1.076 | 0.03914 |
| FN1 | 2.331 | 1.056 | 0.03914 |
| RRM2 | 2.328 | 1.064 | 0.03914 |
| MYBL2 | 2.318 | 1.095 | 0.03914 |
| SLC5A3 | 2.318 | 1.047 | 0.03914 |
| GAPDH | 2.317 | 1.037 | 0.03914 |
| **PLK1** | 2.292 | 1.069 | 0.03914 |
| CENPF | 2.285 | 1.063 | 0.03914 |
| CKS2 | 2.273 | 1.069 | 0.03914 |
| CXCL9 | 2.266 | 1.094 | 0.03914 |
| PHGDH | 2.262 | 1.07 | 0.03914 |
| ACTB | 2.256 | 1.035 | 0.03914 |
| DNAJC15 | 2.206 | 1.057 | 0.03914 |
| GPNMB | 2.205 | 1.048 | 0.03914 |
| PRKCG | 2.193 | 1.493 | 0.03914 |
| LOX | 2.163 | 1.096 | 0.03914 |
| ECT2 | 2.154 | 1.048 | 0.03914 |
| SPP1 | 2.15 | 1.089 | 0.03914 |
| ASPM | 2.112 | 1.1 | 0.04696 |
| THBS2 | 2.11 | 1.059 | 0.04696 |
| PLAUR | 2.103 | 1.05 | 0.04696 |
| CCNA2 | 2.091 | 1.054 | 0.04696 |
| SLAMF7 | 2.081 | 1.115 | 0.04696 |
| ACTA2 | 2.079 | 1.072 | 0.04696 |
| FLNA | 2.078 | 1.042 | 0.04696 |

Blue: sensitive, Red: refractory.
